# Supplementary material for: Biological and therapeutic implications of a unique subtype of NPM1 mutated AML
Source: PubMed Central journal article supplement (PMC7886883; doi:10.1038/s41467-021-21233-0), 2021-02-16
Supplement: 41467_2021_21233_MOESM2_ESM.pdf [file 41467_2021_21233_MOESM2_ESM.pdf]

## **Description of Additional Supplementary Files**

**Supplementary Data 1:** Differential gene expression analysis results

**Supplementary Data 2:** Results for subtype pathway analysis

**Supplementary Data 3:** Motif enrichment analysis

**Supplementary Data 4:** Ranking of drugs using cell line data

**Supplementary Data 5:** Drug-dose response curves for UHN ex vivo screening

**Supplementary Data 6:** List of antibodies used in CyToF analysis
